# Supplementary material for: Photo-switchable smart metal–organic framework membranes with tunable and enhanced molecular sieving performance
Source: Royal Society of Chemistry journal article supplement (doi:10.1039/c8ta10541c), 2018-01-01
Supplement: c8ta10541c1.pdf [file c8ta10541c1.pdf]

## **Supporting Information**

### **Photo-Switchable Smart Metal–Organic Frameworks Membranes with Tunable and Enhanced Molecule Sieving Performance**

Chuanyao Liu <sup>a, b</sup>, Yunzhe Jiang <sup>a</sup>, Chen Zhou <sup>b \*</sup>, Jürgen Caro <sup>c</sup>, Aisheng Huang <sup>a \*</sup>

<sup>a</sup> Shanghai Key Laboratory of Green Chemistry and Chemical Processes, Department of Chemistry, East China Normal University, Dongchuan Road 500, Shanghai 200241, China

<sup>b</sup> Institute of New Energy Technology, Ningbo Institute of Materials Technology and Engineering, CAS, 1219 Zhongguan Road, 315201 Ningbo, China

<sup>c</sup> Institute of Physical Chemistry and Electrochemistry, Leibniz University Hannover, Callinstraße 3-3A, D-30167 Hanover, Germany

### **Experimental details:**

**Chemicals were used without further purification:** Copper nitrate trihydrate (>99%, Aladdin), 4-Nitrobenzoic acid (98%, Energy Chemistry), *trans*-1,2-bis(4-pyridyl)ethylene (BPE, 98%, Energy Chemistry), sodium hydroxide (>99%, Aladdin), glucose (>99%, Aladdin), acetic acid (>99%, Aladdin), *N,N*-dimethylformamide (DMF, 99.8% anhydrous, Aladdin), methanol (MeOH, ≥99.8%, Aladdin), dopamine hydrochloride (DPA, 98%, Aladdin), and tris(hydroxymethyl)aminomethane (Tris, 99%, Aladdin). Porous  $\alpha$ -Al<sub>2</sub>O<sub>3</sub> disks (Fraunhofer Institute IKTS, former HITK/Inocermic, Hermsdorf, Germany: 18 mm in diameter, 1.0 mm in thickness, 70 nm particles in the top layer) were used as supports.

**Synthesis of organic ligand azobenzene-4,4'-dicarboxylic acid (AzDC):** Azobenzene-4,4'-dicarboxylic acid (AzDC) was synthesized according to the procedures as shown elsewhere <sup>1</sup>. 4-Nitrobenzoic acid (5.00 g, 29.9 mmol) was added to sodium hydroxide solution (16.8 g, 420 mmol in 50 ml water), and then the solution was heated to 65 °C until dissolved. Glucose solution (30.8 g, 156 mmol in 100 ml water) was added dropwise into the above solution under 80 °C. After the addition of glucose, the solution was stirred at 65 °C overnight form brown precipitate. The precipitate was filtered, dispersed in water and acidified with acetic acid to pH = 4, whereupon an orange precipitate was obtained. The final product was filtered, washed with water until the filtrate was colorless and dried to yield azobenzene-4,4'-dicarboxylic acid (3.04 g, 11.3 mmol, 37.8 %). The successful synthesis of azobenzene-4,4'-dicarboxylic acid (AzDC) was confirmed by electrospray ionization mass spectrometry (ESI-MS).

**Synthesis of Cu(AzDC)(4,4'-BPE)<sub>0.5</sub> crystals:** Cu(AzDC)(4,4'-BPE)<sub>0.5</sub> crystals were synthesized according to the procedures reported previously <sup>2</sup> with minor modification. A mixture of Cu(NO<sub>3</sub>)<sub>2</sub>·3H<sub>2</sub>O (0.113 g), ABDC (0.127 g) and BPE (0.045 g) was suspended in DMF (50 mL) and heated in in a Teflon-lined stainless steel autoclave at 100 °C for 24 h. The resulting crystals formed were filtered and washed with fresh DMF for three times and then washed with ethanol

three times. The residual solvents were removed from the pore by heating the samples at 120 °C for 24 h under vacuum.

## Reference

1. D. Liu, Y. Xie, H. Shao and X. Jiang, *Angew. Chem. Int. Edit.*, 2009, **48**, 4406-4408.
2. B. Chen, S. Ma, E. J. Hurtado, E. B. Lobkovsky and H.-C. Zhou, *Inorg. Chem.*, 2007, **46**, 8490-8492.

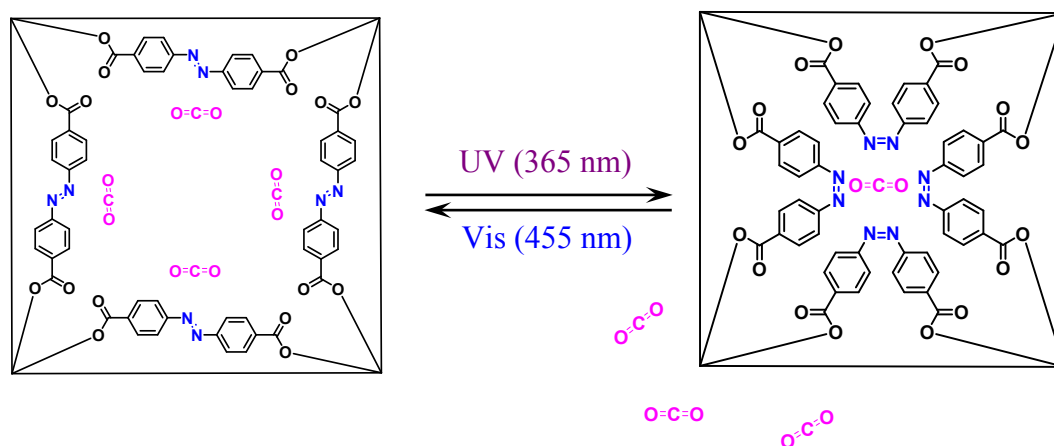

**Fig. S1.** Scheme of the dynamic photo-switching behaviour of  $\text{Cu}(\text{AzDC})(4,4'\text{-BPE})_{0.5}$  between 455 nm Vis light (in the trans state) and 365 nm UV light (in the cis state), resulting in reversible  $\text{CO}_2$  adsorption. As shown in Figure S1., upon exposure to UV light irradiation, the azobenzene bonds obtain energy and change cis–trans states. Although cis azobenzene group has a dipole moment and should adsorb  $\text{CO}_2$  better than trans, but with the azobenzene group’s conformational transition reduces the size of the actual aperture which is used to accommodate  $\text{CO}_2$  molecules and thus trigger  $\text{CO}_2$  release. This is confirmed by the different  $\text{CO}_2$  adsorption performance by irradiation with UV light (365 nm) and Vis light (455 nm) of  $\text{Cu}(\text{AzDC})(4,4'\text{-BPE})_{0.5}$ . The double bond of 2-bis(4-pyridyl)ethylene (BPE) has a similar phenomenon.

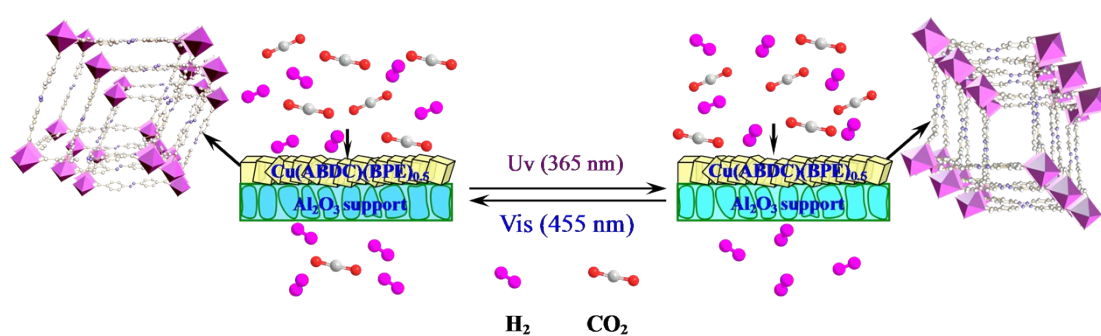

**Fig. S2.** Scheme of the enhancement of  $\text{H}_2/\text{CO}_2$  selectivity with the photo-switchable  $\text{Cu}(\text{AzDC})(4,4'\text{-BPE})_{0.5}$  membrane through controllable irradiation of UV light (365 nm).

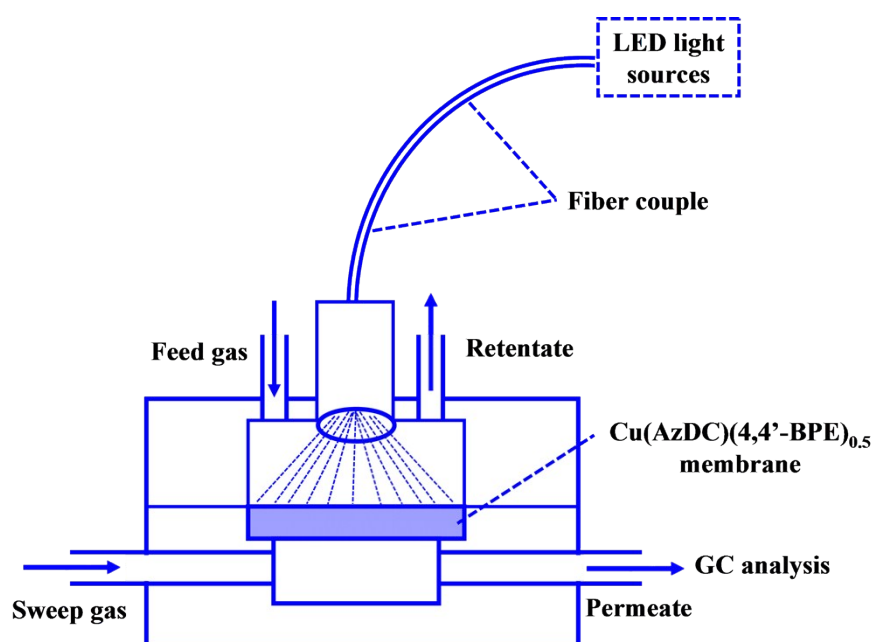

**Fig. S3.** Schematic diagram of the measurement equipment for gas permeation and separation with UV irradiation. A fiber-coupled LED is used for in-situ irradiation of the  $\text{Cu(AzDC)(4,4'-BPE)}_{0.5}$  membrane.

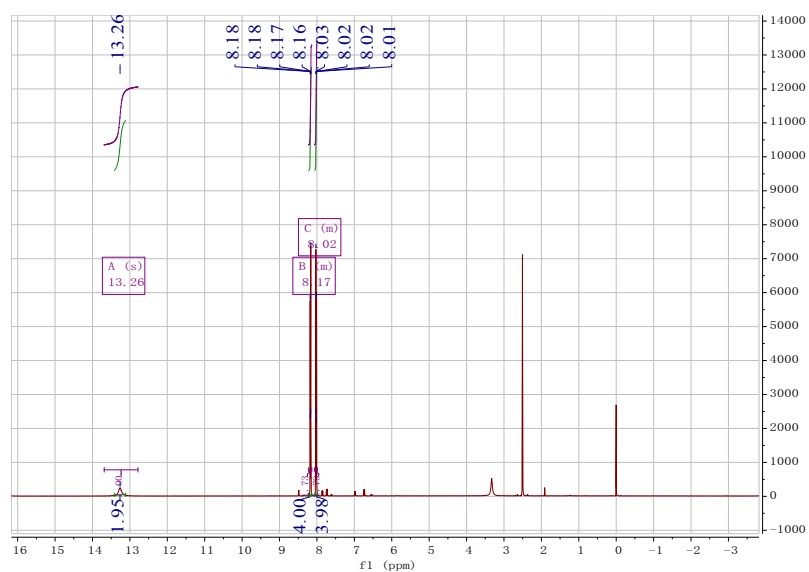

**Fig. S4.**  $^1\text{H}$  NMR spectrum for synthesized azobenzene-4, 4'-dicarboxylic acid (500 MHz, DMSO- $d_6$ , 298K, TMS): 8.02 ppm, 8.17 ppm (8H, m, ArH), 13.26 ppm (2H, s, -COOH).

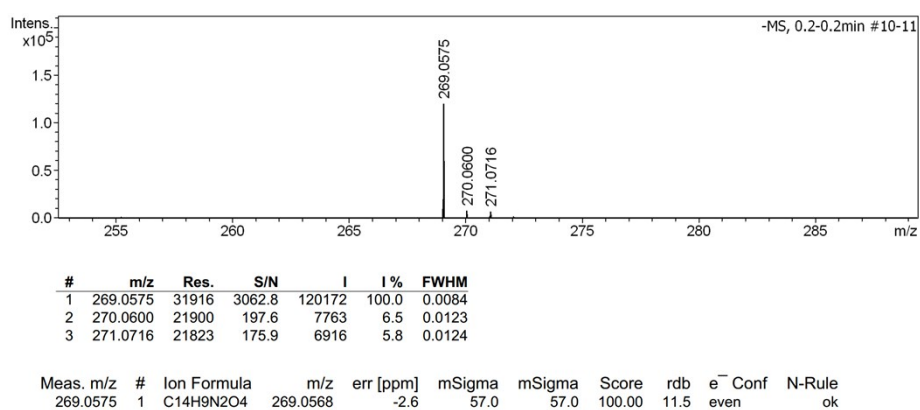

**Fig. S5.** ESI-MS of the synthesized azobenzene-4, 4'-dicarboxylic acid.



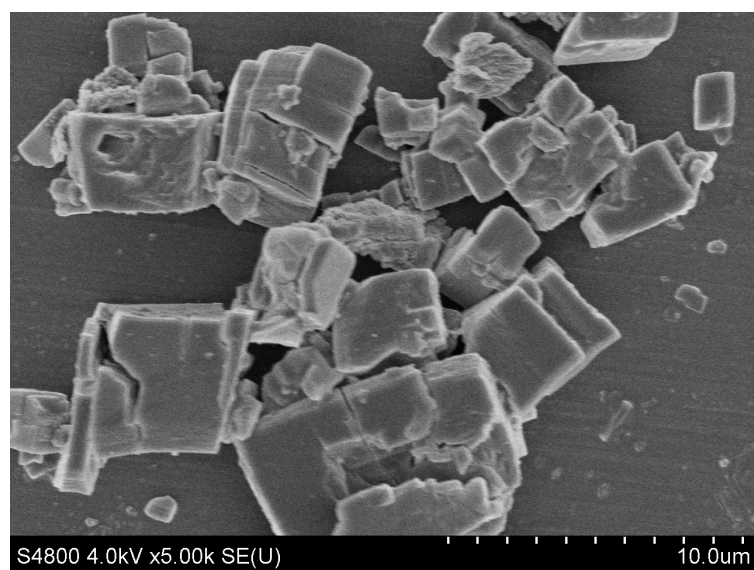

**Fig. S6.** Typical FESEM image of the Cu(AzDC)(4,4'-BPE)<sub>0.5</sub> crystals.

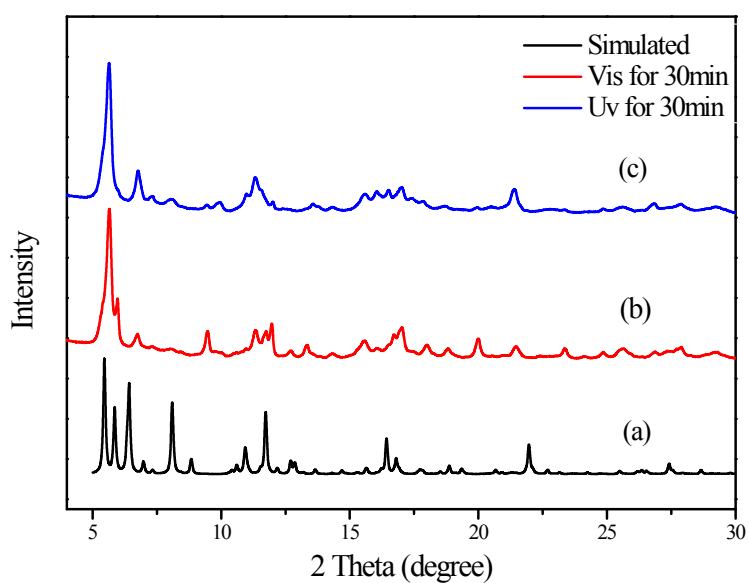

**Fig. S7.** Typical XRD patterns of the simulated Cu(AzDC)(4,4'-BPE)<sub>0.5</sub> (a), Cu(ABDC)(BPE)<sub>0.5</sub> powder before UV irradiation (b) and after UV irradiation. The XRD were taken off-line since the life time of the MOF in the photo-switched state is longer than 1 week (in the dark).

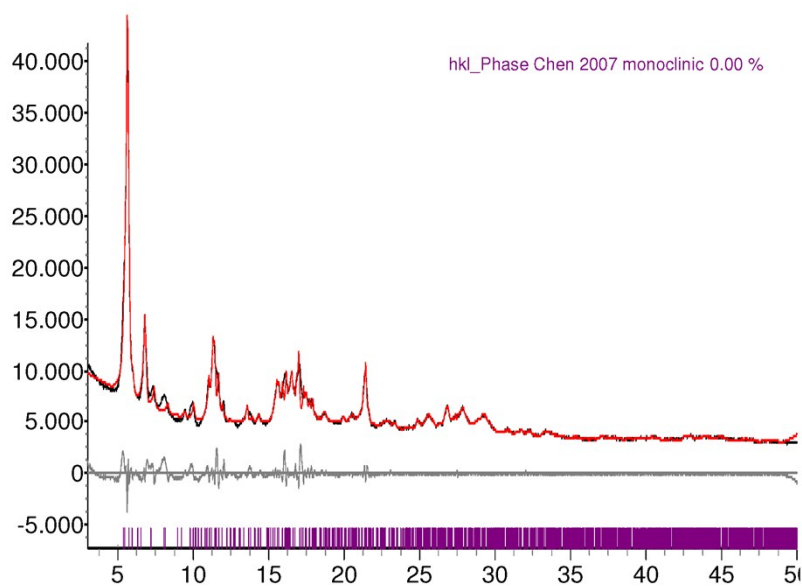

**Fig. S8.** Pawley analysis of XRD pattern of  $\text{Cu}(\text{AzDC})(4,4'\text{-BPE})_{0.5}$  under UV irradiation. Black: Experimental XRD. Red: Pawley-simulated XRD pattern. Grey: Difference curve.

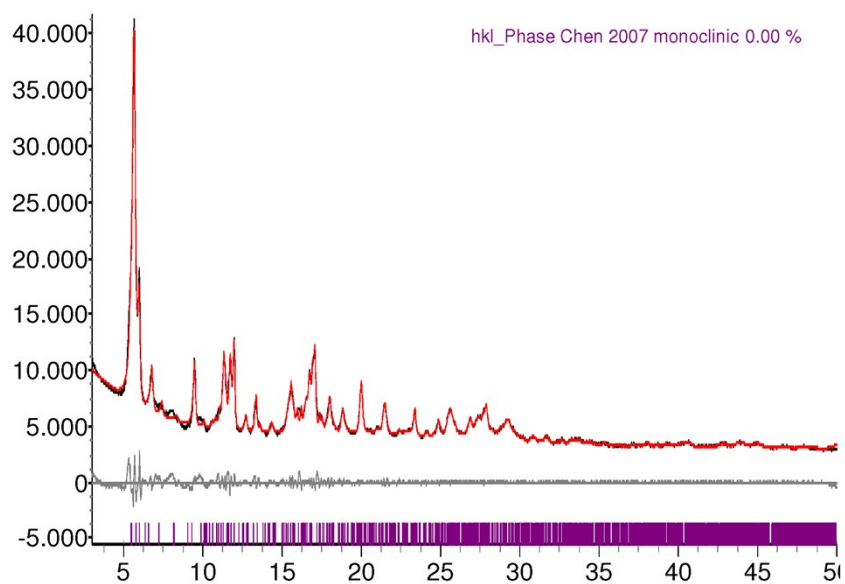

**Fig. S9.** Pawley analysis of XRD pattern of  $\text{Cu}(\text{AzDC})(4,4'\text{-BPE})_{0.5}$  under vis irradiation. Black: Experimental XRD. Red: Pawley-simulated XRD pattern. Grey: Difference curve.

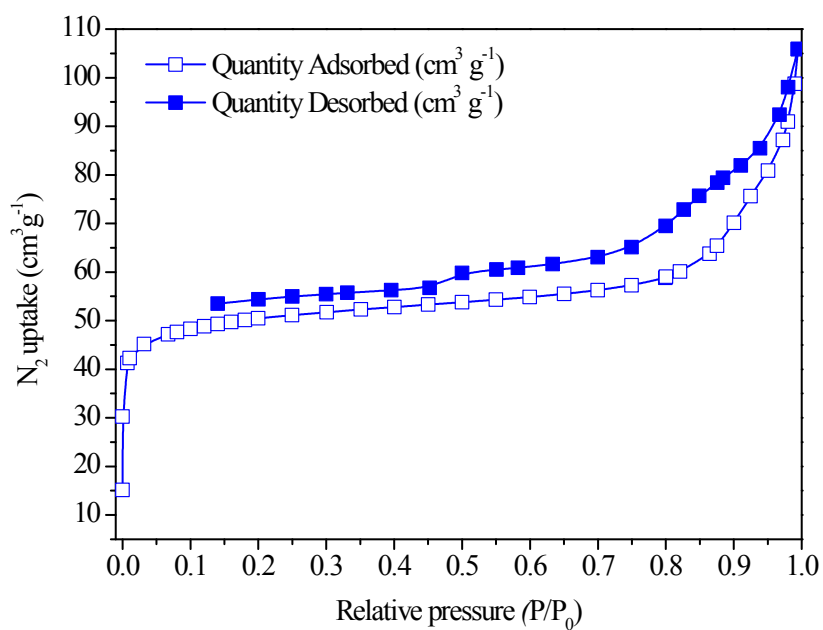

**Fig. S10.** N<sub>2</sub> adsorption isotherms of the Cu(AzDC)(4,4'-BPE)<sub>0.5</sub> powder measured at 77 K.

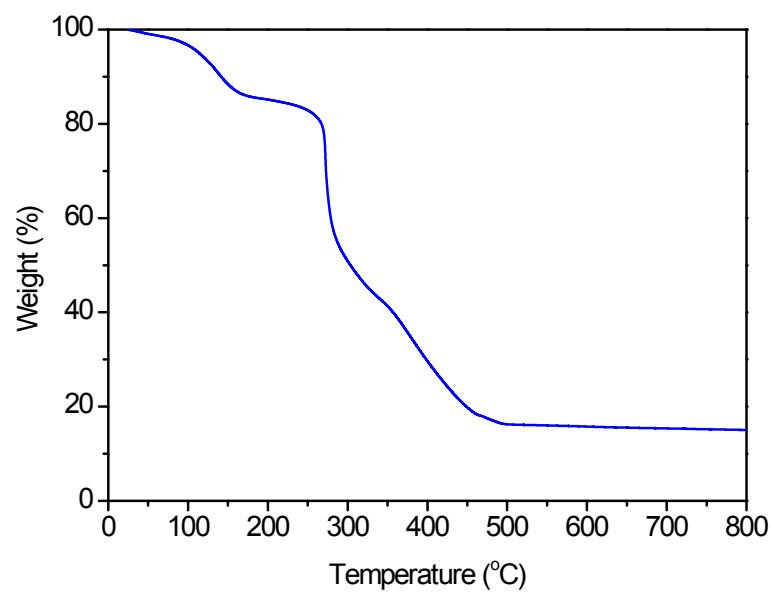

**Fig. S11.** TGA analysis of the  $\text{Cu}(\text{AzDC})(4,4'\text{-BPE})_{0.5}$  powder.

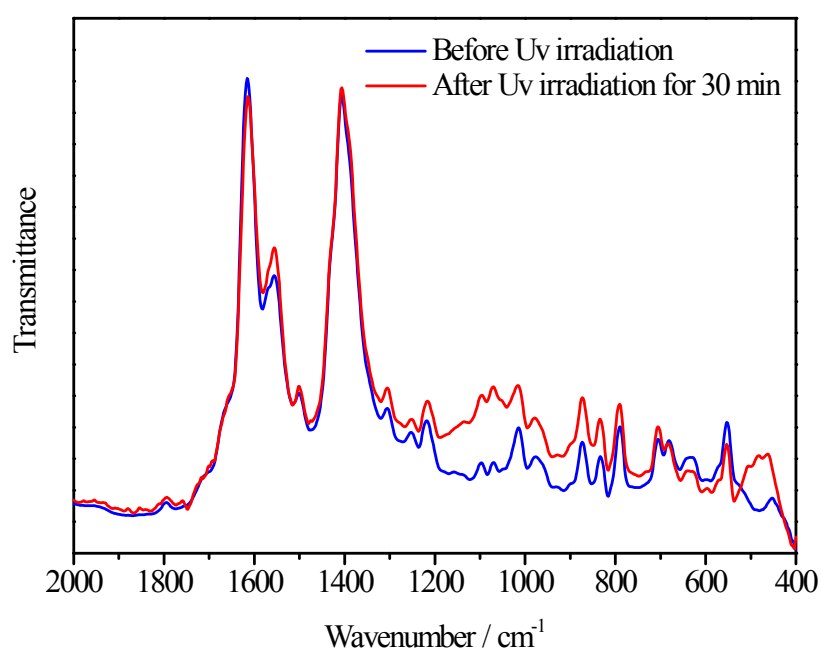

**Fig. S12.** FT-IR spectroscopy of Cu(AzDC)(4,4'-BPE)<sub>0.5</sub> before and after UV irradiation in air at room temperature.

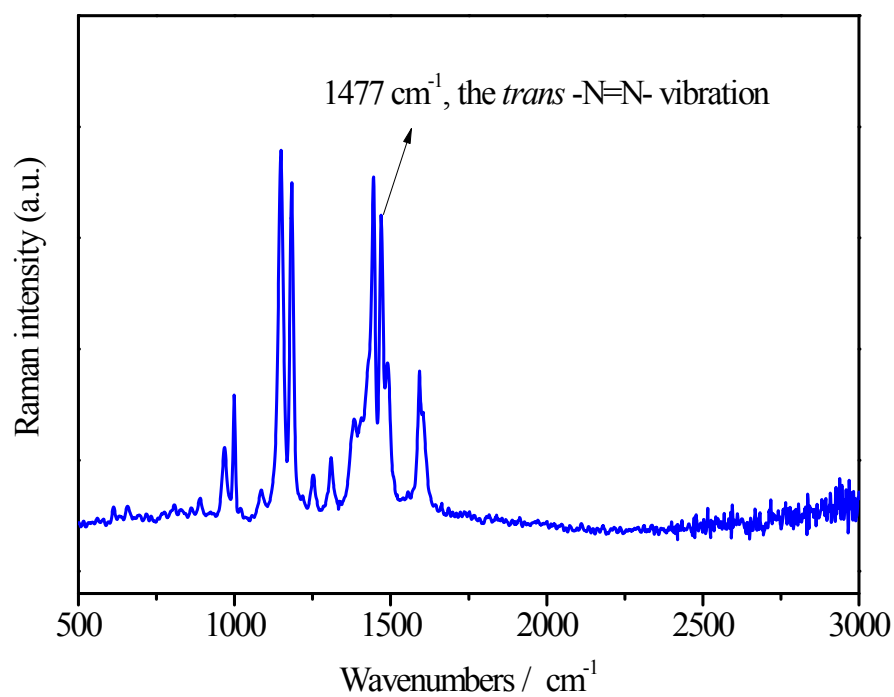

**Fig. S13.** Raman spectrum of the Cu(AzDC)(4,4'-BPE)<sub>0.5</sub> without irradiation after removing the solvent DMF, the *trans* -N=N- vibration of Cu(AzDC)(4,4'-BPE)<sub>0.5</sub> is shown at 1441 cm<sup>-1</sup>.



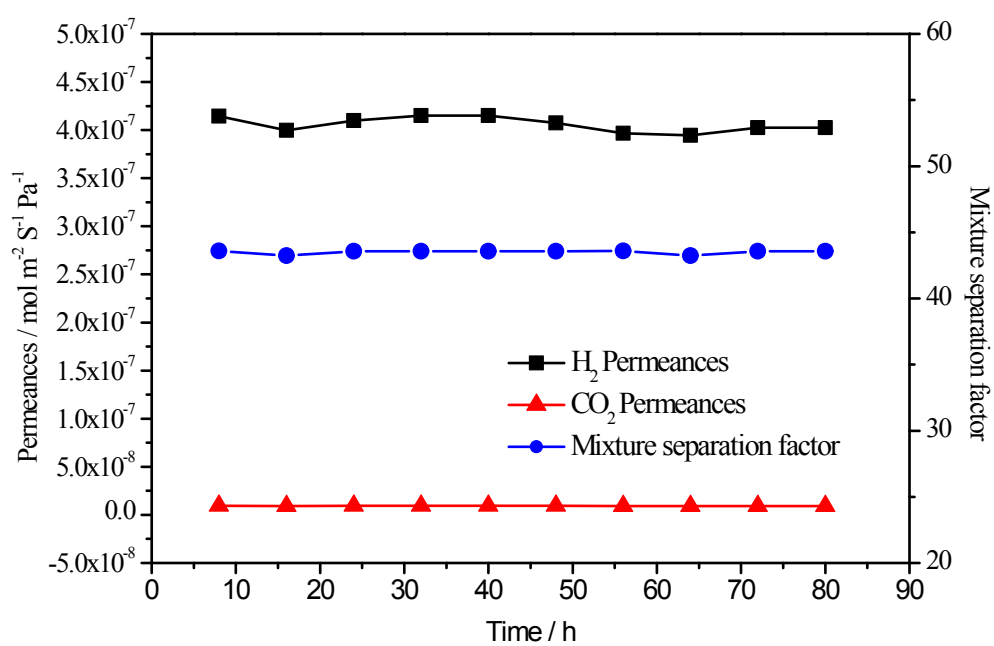

**Fig. S14.** Stability evaluation of the Cu(AzDC)(4,4'-BPE)<sub>0.5</sub> membrane for the separation of an equimolar H<sub>2</sub>/CO<sub>2</sub> mixture at 298K and 1 bar under UV irradiation.

**Table S1.** Results of Pawley fits to monoclinic unit cell (space group C2/c, no. 15).

| Cu(AzDC)(4,4'-<br>BPE) <sub>0.5</sub><br>specimen | Lattice parameter |            |            |          | Cell<br>volume<br>[Å <sup>3</sup> ] | Good-<br>ness<br>of Fit<br>(GOF) |
|---------------------------------------------------|-------------------|------------|------------|----------|-------------------------------------|----------------------------------|
|                                                   | a<br>[Å]          | b<br>[Å]   | c<br>[Å]   | β<br>[°] |                                     |                                  |
| Under UV(365<br>nm) irradiation                   | 19.9361062        | 29.7430318 | 32.8315371 | 98.57906 | 19249.97                            | 7.68                             |
| Under Vis (455<br>nm) irradiation                 | 19.7462516        | 29.5520140 | 32.5983748 | 98.42498 | 18817.22                            | 5.25                             |

**Table S2.** Mixed gases permeance and separation factors of the Cu(AzDC)(4,4'-BPE)<sub>0.5</sub> membrane prepared on PDA-modified Al<sub>2</sub>O<sub>3</sub> disk at 298 K and 1 bar.

| Gas<br>(i/j)                    | Knudsen<br>constant | Performance of Cu(AzDC)(4,4'-BPE) <sub>0.5</sub> membrane                  |                                                                            |      |                                                                            |                                                                            |      |
|---------------------------------|---------------------|----------------------------------------------------------------------------|----------------------------------------------------------------------------|------|----------------------------------------------------------------------------|----------------------------------------------------------------------------|------|
|                                 |                     | Vis (455 nm)                                                               |                                                                            |      | UV (365 nm)                                                                |                                                                            |      |
|                                 |                     | Permeances (i) (<br>mol/m <sup>2</sup> ·s <sup>-1</sup> Pa <sup>-1</sup> ) | Permeances (j) (<br>mol/m <sup>2</sup> ·s <sup>-1</sup> Pa <sup>-1</sup> ) | SF   | Permeances (i) (<br>mol/m <sup>2</sup> ·s <sup>-1</sup> Pa <sup>-1</sup> ) | Permeances (j) (<br>mol/m <sup>2</sup> ·s <sup>-1</sup> Pa <sup>-1</sup> ) | SF   |
| H <sub>2</sub> /CO <sub>2</sub> | 4.7                 | 4.20 x 10 <sup>-7</sup>                                                    | 1.98 x 10 <sup>-8</sup>                                                    | 21.3 | 4.03 x 10 <sup>-7</sup>                                                    | 9.22 x 10 <sup>-9</sup>                                                    | 43.7 |
| H <sub>2</sub> /N <sub>2</sub>  | 3.7                 | 4.25 x 10 <sup>-7</sup>                                                    | 2.28 x 10 <sup>-8</sup>                                                    | 18.6 | 4.16 x 10 <sup>-7</sup>                                                    | 2.32 x 10 <sup>-8</sup>                                                    | 17.9 |
| H <sub>2</sub> /CH <sub>4</sub> | 2.8                 | 4.23 x 10 <sup>-7</sup>                                                    | 3.06 x 10 <sup>-8</sup>                                                    | 13.8 | 4.06 x 10 <sup>-7</sup>                                                    | 2.96 x 10 <sup>-8</sup>                                                    | 13.7 |

SF: separation factor

**Table S3.** Comparison of H<sub>2</sub>/CO<sub>2</sub> selectivity versus H<sub>2</sub> permeability of the Cu(AzDC)(4,4'-BPE)<sub>0.5</sub> membrane with literature data of other MOF membranes.

| Membrane                                     | Thickness (μm) | H <sub>2</sub> permeance<br>(mol·m <sup>-2</sup> ·s <sup>-1</sup> ·Pa <sup>-1</sup> ) | H <sub>2</sub> Permeability*<br>(Barrers) | Selectivity<br>(H <sub>2</sub> /CO <sub>2</sub> ) | References |
|----------------------------------------------|----------------|---------------------------------------------------------------------------------------|-------------------------------------------|---------------------------------------------------|------------|
| Zn <sub>2</sub> (bim) <sub>4</sub> nanosheet | 0.1            | 7.74 × 10 <sup>-6</sup>                                                               | 2311.82                                   | 230                                               | 1          |
| JUC-150                                      | 20             | 1.83 × 10 <sup>-7</sup>                                                               | 10931.89                                  | 38.7                                              | 2          |
| CuBTC/MIL-100                                | 20             | 1.05 × 10 <sup>-8</sup>                                                               | 627.24                                    | 89                                                | 3          |
| ZIF-90                                       | 20             | 2.83 × 10 <sup>-7</sup>                                                               | 16905.61                                  | 21                                                | 4          |
| MOF-74 (Mg)                                  | 10             | 8.20 × 10 <sup>-8</sup>                                                               | 2449.22                                   | 28                                                | 5          |
| MAMS-1                                       | 0.04           | 1.88 × 10 <sup>-6</sup>                                                               | 224.61                                    | 235                                               | 6          |
| NH <sub>2</sub> -MIL-53                      | 19.9           | 1.99 × 10 <sup>-6</sup>                                                               | 118282.55                                 | 30.9                                              | 7          |
| ZIF-95                                       | 30             | 2.46 × 10 <sup>-6</sup>                                                               | 220430.10                                 | 34.9                                              | 8          |
| ZIF-100                                      | 50             | 5.80 × 10 <sup>-6</sup>                                                               | 8661.88                                   | 72                                                | 9          |
| Cu(AzDC)(4,4'-BPE) <sub>0.5</sub>            | 10             | 4.00 × 10 <sup>-6</sup>                                                               | 11947.43                                  | 43.6                                              | This work  |

\* Permeability is calculated as the membrane permeance multiplied by the membrane thickness. 1 Barrer = 3.348 × 10<sup>-16</sup> mol m/ (m<sup>2</sup> s Pa).

#### Reference:

1. Y. Peng, Y. Li, Y. Ban, H. Jin, W. Jiao, X. Liu and W. Yang, *Science*, 2014, **346**, 1356-1359.
2. Z. Kang, M. Xue, L. Fan, L. Huang, L. Guo, G. Wei, B. Chen and S. Qiu, *Energ. Environ. Sci.*, 2014, **7**, 4053-4060.
3. Z. Kang, S. Wang, L. Fan, M. Zhang, W. Kang, J. Pang, X. Du, H. Guo, R. Wang and D. Sun, *Commun. Chem.*, 2018, **1**.
4. A. Huang, W. Dou and J. Caro, *J. Am. Chem. Soc.*, 2010, **132**, 15562-15564.
5. N. Wang, A. Mundstock, Y. Liu, A. Huang and J. Caro, *Chem. Eng. Sci.*, 2015, **124**, 27-36.
6. X. Wang, C. Chi, K. Zhang, Y. Qian, K. M. Gupta, Z. Kang, J. Jiang and D. Zhao, *Nat. Commun.*, 2017, **8**, 14460.
7. F. Zhang, X. Zou, X. Gao, S. Fan, F. Sun, H. Ren and G. Zhu, *Adv. Funct. Mater.*, 2012, **22**, 3583-3590.
8. A. Huang, Y. Chen, N. Wang, Z. Hu, J. Jiang and J. Caro, *Chem. Commun.*, 2012, **48**, 10981-10983.
9. N. Wang, Y. Liu, Z. Qiao, L. Diestel, J. Zhou, A. Huang and J. Caro, *J. Mater. Chem. A*, 2015, **3**, 4722-4728.

**Table S4.** Separation performances of three independent Cu(AzDC)(4,4'-BPE)<sub>0.5</sub> membranes for the separation of H<sub>2</sub>/CO<sub>2</sub> mixtures at 298 K and 1 bar under UV (365 nm) irradiation.

| Membrane | H <sub>2</sub> permeance<br>(mol·m <sup>-2</sup> ·s <sup>-1</sup> ·Pa <sup>-1</sup> ) | CO <sub>2</sub> permeance<br>(mol·m <sup>-2</sup> ·s <sup>-1</sup> ·Pa <sup>-1</sup> ) | H <sub>2</sub> /CO <sub>2</sub> selectivity | Average selectivity | Standard deviation of<br>selectivity |
|----------|---------------------------------------------------------------------------------------|----------------------------------------------------------------------------------------|---------------------------------------------|---------------------|--------------------------------------|
| M1       | 3.97 x 10 <sup>-7</sup>                                                               | 9.19 x 10 <sup>-9</sup>                                                                | 43.2                                        |                     |                                      |
| M2       | 4.09 x 10 <sup>-7</sup>                                                               | 9.25 x 10 <sup>-9</sup>                                                                | 44.3                                        | 43.53               | 0.54                                 |
| M3       | 3.96 x 10 <sup>-7</sup>                                                               | 9.21 x 10 <sup>-9</sup>                                                                | 43.1                                        |                     |                                      |
